# Supplementary material for: Nitrogen, sulfur co-doped carbon coated zinc sulfide for efficient hydrogen peroxide electrosynthesis
Source: Royal Society of Chemistry journal article supplement (doi:10.1039/d0dt04348f), 2021-01-01
Supplement: d0dt04348f1.pdf [file d0dt04348f1.pdf]

## Electronic Supplementary Information

### **Nitrogen, sulfur co-doped carbon coated zinc sulfide for efficient hydrogen peroxide electrosynthesis**

Chengxiang Dai<sup>a,b</sup>, Rongrong Li<sup>a,b</sup>, Haichuan Guo<sup>a</sup>, Shuqin Liang<sup>a</sup>, Hangjia Shen<sup>a\*</sup>,  
Tiju Thomas<sup>c\*</sup>, Minghui Yang<sup>a,b\*</sup>

<sup>a</sup>Ningbo Institute of Industrial Technology, Chinese Academy of Sciences, Ningbo, 315201, China

<sup>b</sup>Center of Materials Science and Optoelectronics Engineering, University of Chinese Academy of Sciences, Beijing 100049, China.

<sup>c</sup>Department of Metallurgical and Materials Engineering and the DST Solar Energy Harnessing Center, Indian Institute of Technology Madras, Chennai 600036, India

\* Corresponding Author: tt332@cornell.edu; myang@nimte.ac.cn

## **Experimental edition**

### **Synthesis of ZnS@C**

6.39 g sodium diethyldithiocarbamate(DDTC) and 1.91 g  $\text{ZnCl}_2$  were dissolved in 150 ml deionized (DI) water using magnetic stirring. The precursor of zinc (II) diethyldithiocarbamate was formed instantly. After stirring for 24 h at room temperature, the white precipitate was separated and wash with DI water and ethanol for several times, and dried at 60 °C for 24 h. Then, it was heated to 700 °C under flowing Ar for 2 h at a heating rate of 5 °C min<sup>-1</sup>. The sample cooled to room temperature was denoted as ZnS@C. The sample ZnS@C-acid was obtained through the removal of ZnS from ZnS@C in 2 M HCl. 0.2 g ZnS@C was added in a flask with 20 mL 2 M HCl solution in 40 °C for 12 h. The residual sample was collected by the centrifuge (8000 rpm, 2 min) and washed by DI water for three times, and the product was under vacuum at 60 °C for 12 h. Finally, ZnS@C-acid was obtained.

### **Characterization**

Powder X-ray diffraction (PXRD) was performed on MiniFlex 600 X-ray Diffractometer using Cu K $\alpha$  radiation at a scan rate of 1 ° min<sup>-1</sup>. X-ray photoelectron spectroscopy (XPS) was collected using an Axis Ultra DLD spectroscope. The morphology was observed on transmission electron microscopy using S4800 and Verios G4 UC field emission scanning electron microscopy (FESEM). Transmission electron microscopy (TEM) and high-resolution transmission electron microscopy (HRTEM) were performed on a Thermo Fisher Talos-F200x TEM with a spherical aberration corrector. The element distribution of composites was determined with an energy dispersive spectrometer (EDS) attached to the TEM instrument.

### **Electrochemical measurements**

A three-electrode system was measured on CHI 760E to collect electrochemical measurements at room temperature. A saturated calomel electrode (SCE) and a graphite electrode were as the reference and counter electrode. All the potentials were calibrated to the reversible hydrogen electrode (RHE) using the equation:

$$E_{\text{RHE}} = E_{\text{SCE}} + (0.273 + 0.0592\text{pH})\text{V} \quad (1)$$

The catalyst ink was prepared by mixing NC-900 in isopropanol/water solution =1:1 with Nafion ionomer (0.1%). After sonication for 30 min, catalyst ink was loaded onto a glassy carbon electrode ( $d=5.61\text{ cm}$ ) with a catalyst loading of  $0.3\text{ mg cm}^{-2}$ . Linear sweep voltammetry (LSV) curves were carried out in  $0.1\text{ M KOH}$  solution at a rotation speed of  $1600\text{ rpm}$ . Polarization curves in Ar-saturated electrolytes were recorded as background current at a scan rate of  $10\text{ mV s}^{-1}$ . The Pt ring was set at a constant potential of  $1.15\text{ V}$  (vs. RHE) during all tests.

Gradual degradation of  $I_r$  was collected during the continuous rotating ring-disk electrode (RRDE) stability test, which according to the previous literature can be readily recovered by rapid cyclic voltammetry at low potentials to reduce PtOx.<sup>1</sup> The  $\text{H}_2\text{O}_2$  selectivity and the number of electrons transferred are calculated based on the followed equations consisted of both disk and ring currents:

$$\text{H}_2\text{O}_2\text{ selectivity (\%)} = 200 \times (I_r/N)/(I_d + I_r/N) \quad (2)$$

$$n = 4 \times I_d/(I_d + I_r/N) \quad (3)$$

where  $I_d$  is the disk current,  $I_r$  is the ring current,  $N$  is the current collection efficiency. As previous literature,<sup>2</sup>  $N$  was measured in the ferrocyanide/ferricyanide half reaction system at the rotation rate of  $1600\text{ rpm}$ .

For peroxide reduction reaction (PRR) analysis, the polarization curves were recorded at the rotation rate of  $1600\text{ rpm}$  in Ar-saturated  $0.1\text{ M KOH}$  with  $10\text{ mM H}_2\text{O}_2$ .

Electrocatalytic  $\text{H}_2\text{O}_2$  production in  $0.1\text{ M KOH}$  was performed in a two-chamber cell with Nafion 115 membrane as the separator. Both the cathode compartment ( $17\text{ ml}$ ) and anode compartment were filled with the same electrolyte ( $0.1\text{ M KOH}$ ). The working electrode was prepared by coating of the catalyst ink on

the carbon paper (CP, the efficient area is 0.785 cm<sup>2</sup>) with a catalyst loading of 0.3 mg cm<sup>-2</sup>.

H<sub>2</sub>O<sub>2</sub> concentration was determined using H<sub>2</sub>O<sub>2</sub> electroanalysis method using a platinum sheet as working electrode. CHI 760E workstation was applied in analytical testes. This method is based on different response currents of changed H<sub>2</sub>O<sub>2</sub> concentrations in 0.1 M KOH. Chronoamperometry was used to measure currents at applied potential of 1.15 V (*vs.* RHE). In order to draw a calibration curve, we measured the current with the addition of different standard H<sub>2</sub>O<sub>2</sub> solution. Based on the linear fitting of H<sub>2</sub>O<sub>2</sub> concentration with the response current, the H<sub>2</sub>O<sub>2</sub> concentration produced can be determined.

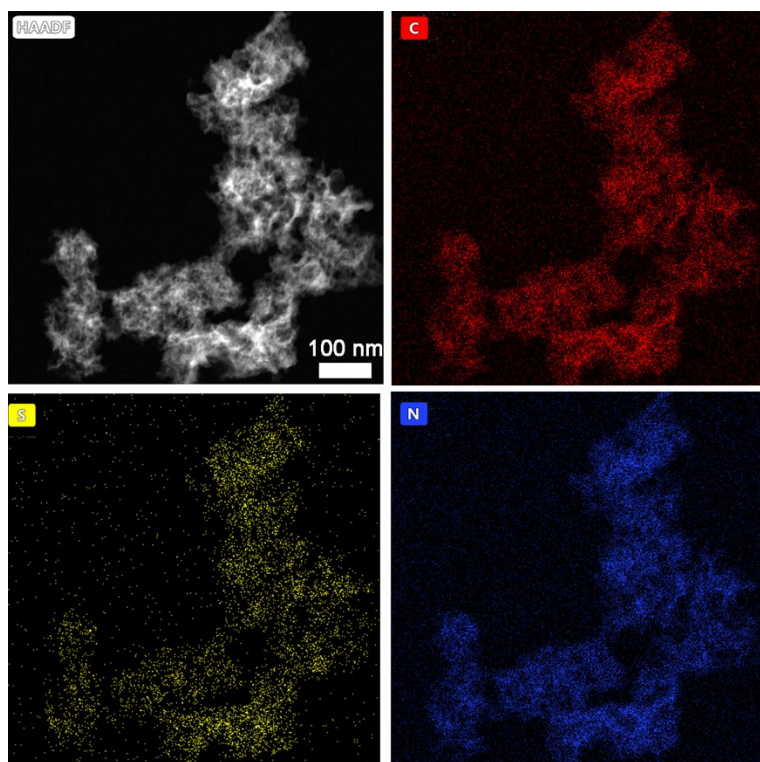

Figure S1. HAADF-STEM and EDX mapping images of C, N, S (ZnS@C-acid).

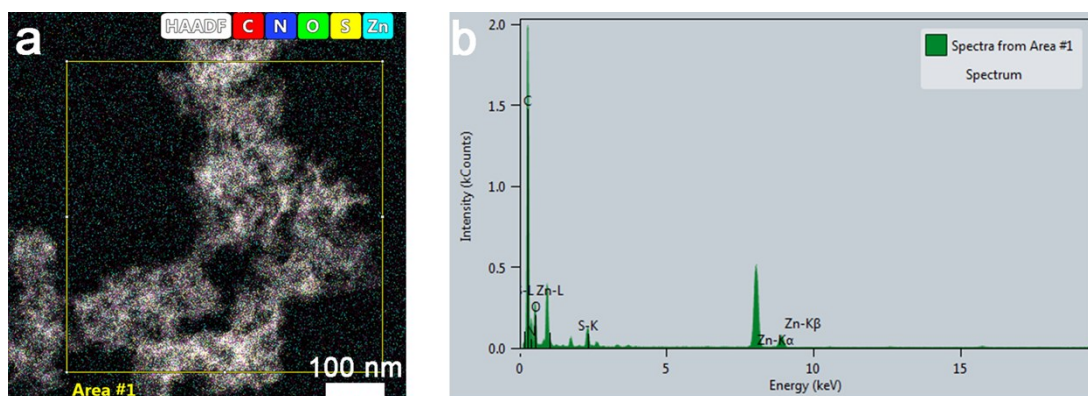

Figure S2. HAADFSTEM and EDX mapping images of C, N, S, Zn (ZnS@C-acid) (a) and the analysis of elementary distribution of ZnS@C-acid (b).

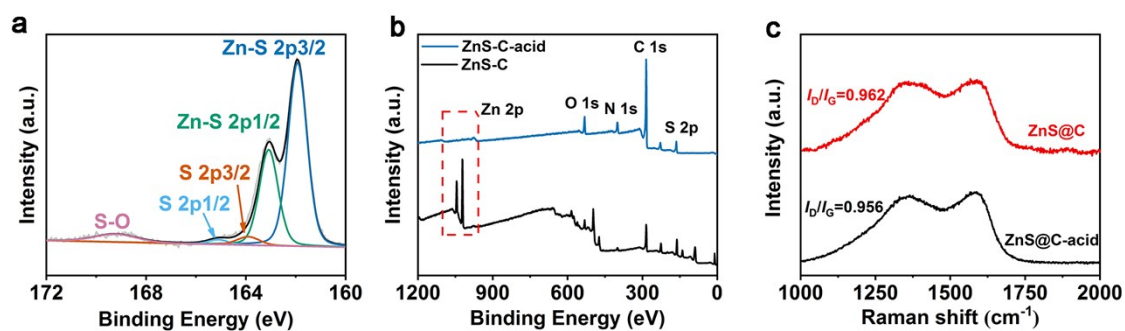

Figure S3. (a) The detailed deconvoluted S 2p survey of ZnS@C. (b) Fully scanned XPS spectra of the surface chemical composition of ZnS@C and ZnS@C-acid. (c) Raman spectra of ZnS@C and ZnS@C-acid.

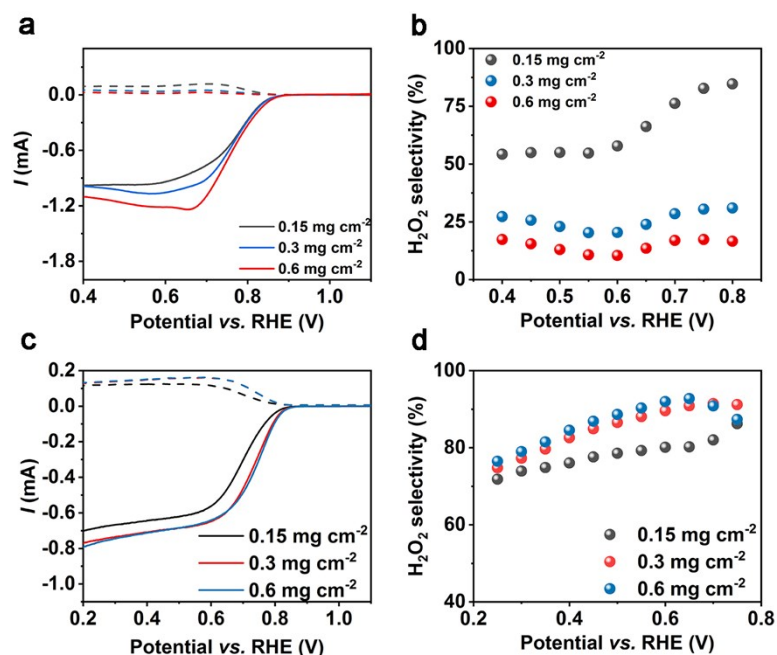

Figure S4. Polarization curve and real-time ring current of ZnS@C-acid (a) and ZnS@C (c) at different loading amount. The corresponding H<sub>2</sub>O<sub>2</sub> selectivity of ZnS@C-acid (b) and ZnS@C (d).



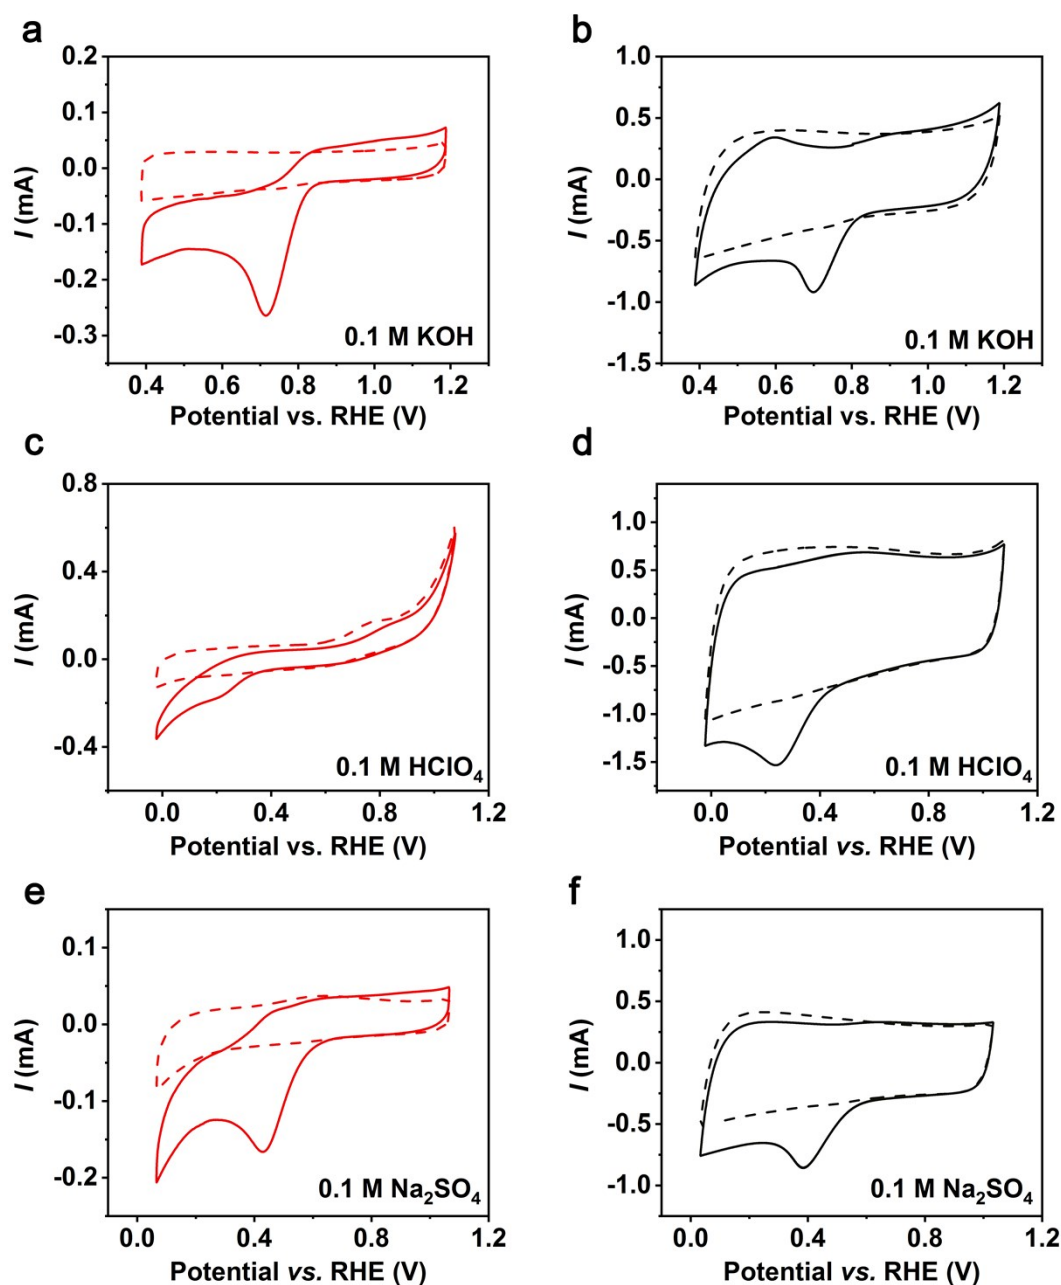

Figure S5. CV tests of ZnS@C (a, c, e) and ZnS@C-acid (b, d, f) in O<sub>2</sub>-saturated (solid line) and Ar-saturated (dash line) electrolyte.

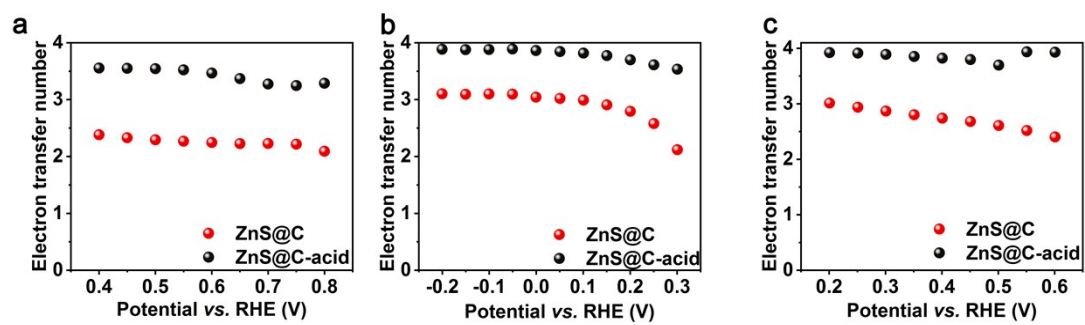

Figure S6. Electron transfer number of ZnS@C and ZnS@C-acid in 0.1 M KOH (a), 0.1 M HClO<sub>4</sub>(b) and 0.1 M Na<sub>2</sub>SO<sub>4</sub>(c).

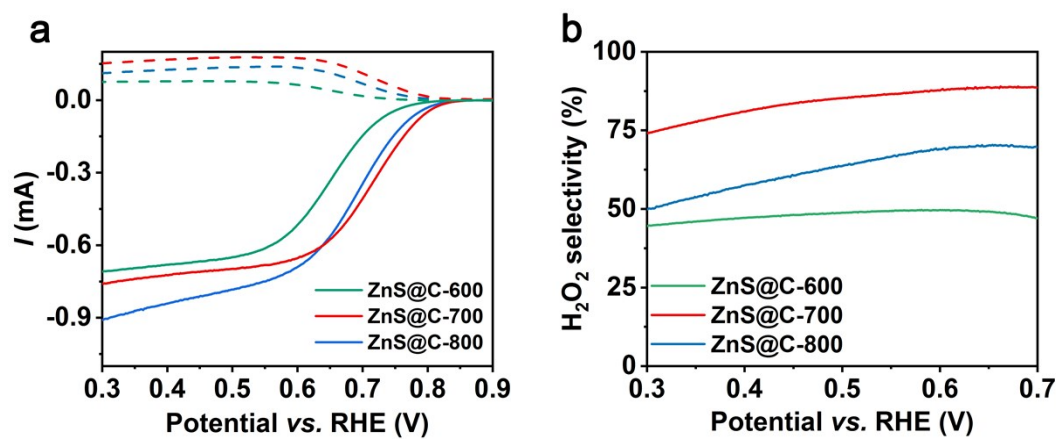

Figure S7. LSV (solid lines) of RRDE with the ring current (dashed lines) collected on the Pt ring at 1600 rpm in the  $O_2$ -saturated 0.1 M KOH.

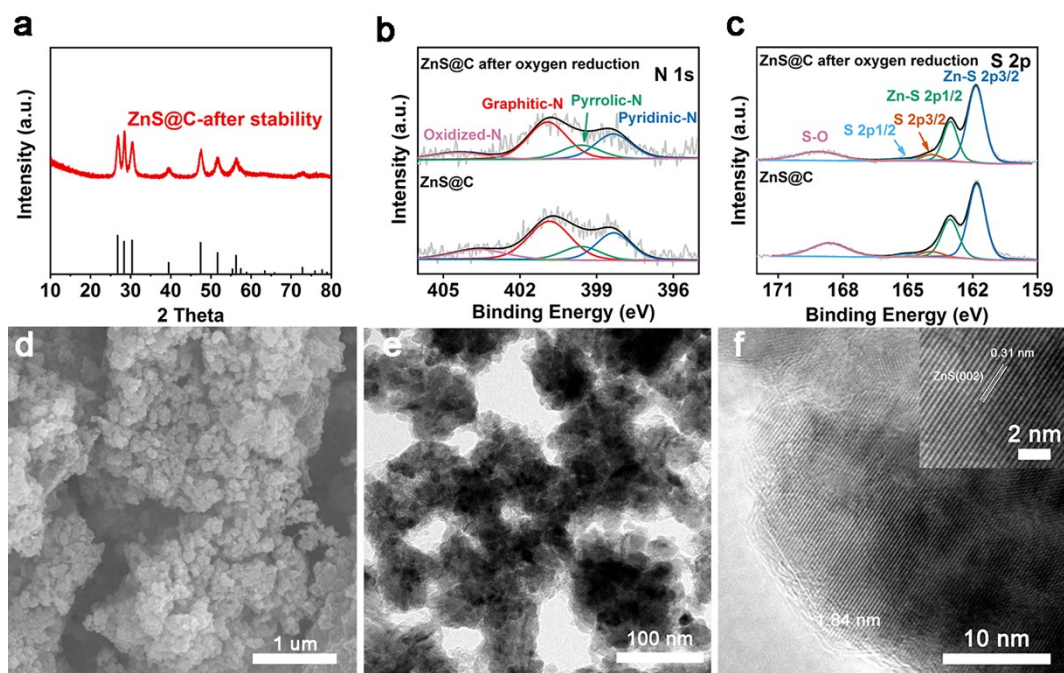

Figure S8. (a) PXRD of ZnS@C after long-term oxygen reduction. (b) High-resolution XPS N 1s spectrum of ZnS@C before and after long-term oxygen reduction. (c) High-resolution XPS S 2p spectrum of ZnS@C before and after long-term oxygen reduction. (d) SEM images of ZnS@C after oxygen reduction. (e) TEM of ZnS@C after oxygen reduction. (f) HRTEM of ZnS@C after oxygen reduction.

Table S1. The content of elementary in the ZnS@C-acid by TEM.

| Element Family | Mass Fraction (%) | Mass Error (%) | Fit Error (%) |
|----------------|-------------------|----------------|---------------|
| C              | 84.19             | 3.72           | 3.02          |
| N              | 2.53              | 0.60           | 12.63         |
| O              | 8.43              | 1.71           | 0.96          |
| S              | 4.57              | 0.86           | 0.69          |
| Zn             | 0.28              | 0.05           | 8.85          |

Table S2. Reactivity and selectivity comparison of the N, S co-doped carbon coated zinc sulfide and other reported electrocatalysts for H<sub>2</sub>O<sub>2</sub> through ORR that involves 2e<sup>-</sup> process.

| Sample       | Loading<br>(mg cm <sup>-2</sup> ) | Potential @ 1<br>mA cm <sup>-2</sup> (V<br>vs.RHE) | Selectivity @<br>1.0 mA cm <sup>-2</sup> | Electrolyte                           | Ref.          |
|--------------|-----------------------------------|----------------------------------------------------|------------------------------------------|---------------------------------------|---------------|
| N-O-P-C-800  | 0.19                              | 0.59                                               | 90%                                      | 0.1 M KOH                             | <sup>3</sup>  |
| NCA-850      | 0.196                             | 0.7                                                | 90%                                      | 0.1 M KOH                             | <sup>4</sup>  |
| CB-600       | 0.2                               | 0.74                                               | 52.6%                                    | 0.1 M Na <sub>2</sub> SO <sub>4</sub> | <sup>5</sup>  |
| Fe-CNT       | 0.1                               | 0.76                                               | 90%                                      | 0.1 M KOH                             | <sup>1</sup>  |
| O-CNT        | 0.1                               | 0.7                                                | 90%                                      | 0.1 M PBS                             | <sup>6</sup>  |
| Co-POC-O     | 0.1                               | 0.78                                               | 84%                                      | 0.1 M KOH                             | <sup>7</sup>  |
| cCNT         | 0.6                               | 0.6                                                | ~85%                                     | 0.1 M KOH                             | <sup>8</sup>  |
| FRC          | 0.2                               | 0.62                                               | ~95%                                     | 0.1 M KOH                             | <sup>9</sup>  |
| G250         | 0.255                             | 0.39                                               | ~75%                                     | 0.1 M KOH                             | <sup>10</sup> |
| meso-BMP-800 | 0.3                               | 0.33                                               | ~65%                                     | 0.1 M HClO <sub>4</sub>               | <sup>11</sup> |
| CB+CTAB      | 0.24                              | 0.71                                               | ~95%                                     | 0.1 M KOH                             | <sup>12</sup> |
| ZnS@C        | 0.3                               | 0.74                                               | 88.9%                                    | 0.1 M KOH                             | this work     |

## Reference

1. K. Jiang, S. Back, A. J. Akey, C. Xia, Y. Hu, W. Liang, D. Schaak, E. Stavitski, J. K. Nørskov, S. Siahrostami and H. Wang, *Nat Commun*, 2019, **10**, 3997.
2. R. Zhou, Y. Zheng, M. Jaroniec and S.-Z. Qiao, *ACS Catalysis*, 2016, **6**, 4720-4728.
3. H.-X. Zhang, S.-C. Yang, Y.-L. Wang, J.-C. Xi, J.-C. Huang, J.-F. Li, P. Chen and R. Jia, *Electrochimica Acta*, 2019, **308**, 74-82.
4. H. Zhao, X. Shen, Y. Chen, S. N. Zhang, P. Gao, X. Zhen, X. H. Li and G. Zhao, *Chem Commun (Camb)*, 2019, **55**, 6173-6176.
5. H. Zhang, Y. Li, Y. Zhao, G. Li and F. Zhang, *ACS Appl Mater Interfaces*, 2019, **11**, 27846-27853.
6. Z. Lu, G. Chen, S. Siahrostami, Z. Chen, K. Liu, J. Xie, L. Liao, T. Wu, D. Lin, Y. Liu, T. F. Jaramillo, J. K. Nørskov and Y. Cui, *Nature Catalysis*, 2018, **1**, 156-162.
7. B. Q. Li, C. X. Zhao, J. N. Liu and Q. Zhang, *Adv Mater*, 2019, **31**, e1808173.
8. L. Z. Peng, P. Liu, Q. Q. Cheng, W. J. Hu, Y. A. Liu, J. S. Li, B. Jiang, X. S. Jia, H. Yang and K. Wen, *Chem Commun (Camb)*, 2018, **54**, 4433-4436.
9. Z. Meng, J. Li, F. Huo, Y. Huang and Z. Xiang, *Chemical Engineering Science*, 2017, **174**, 222-228.
10. C. Y. Chen, C. Tang, H. F. Wang, C. M. Chen, X. Zhang, X. Huang and Q. Zhang, *ChemSusChem*, 2016, **9**, 1194-1199.
11. T. P. Feller, F. Hasche, P. Strasser and M. Antonietti, *J Am Chem Soc*, 2012, **134**, 4072-4075.
12. K.-H. Wu, D. Wang, X. Lu, X. Zhang, Z. Xie, Y. Liu, B.-J. Su, J.-M. Chen, D.-S. Su, W. Qi and S. Guo, *Chem*, 2020, **6**, 1443-1458.
